# Supplementary material for: Blocking ubiquitination of hnRNPA1 maintains the self-renewal of breast cancer stem cells via mutually exclusive splicing of PKM pre-mRNA
Source: Research Square preprint supplement (doi:10.21203/rs.3.rs-7722676/v1), 2025-10-15
Supplement: Supplementary file 1 [file d3841e053b3635b3ac28bd88.docx]

## Supplemental information

**Table S1. The relationship between LINC00887 expression and clinical pathology factors in 136 breast cancer patients**

| **Characteristics** | **Number** | **LINC00887** | | ***P*-value** |
| --- | --- | --- | --- | --- |
| **Low(%)** | **High(%)** |
| **Age** |  |  |  |  |
| <=53 | 69 | 27(39.1) | 42(60.9) | 0.101 |
| >53 | 67 | 17(25.4) | 50(74.6) |
| **Differentiated Degree** |  |  |  |  |
| Grade1 | 91 | 25(27.5) | 66(72.5) | 1.000 |
| Grade2 | 14 | 4(28.6) | 10(71.4) |
| **Infiltration** |  |  |  |  |
| NO | 19 | 10(52.6) | 9(47.4) | 0.058 |
| YES | 111 | 31(27.9) | 80(72.1) |
| **Tumor Size** |  |  |  |  |
| <=2.5 | 55 | 28(50.9) | 27(49.1) | **<0.0001** |
| >2.5 | 79 | 14(17.7) | 49(82.3) |
| **Lymphatic metastasis** |  |  |  |  |
| NO | 74 | 27(36.5) | 47(63.5) | 0.077 |
| YES | 53 | 11(20.8) | 42(63.5) |
| **Pathogenetic side** |  |  |  |  |
| Left | 48 | 16(33.3) | 32(66.7) | 1.000 |
| right | 38 | 12(31.6) | 26(69.4) |
| **Stages** |  |  |  |  |
| I&II | 30 | 28(93.3) | 2(6.7) | **<0.0001** |
| III | 106 | 16(15.1) | 90(84.9) |

**Table S2. Short hairpin RNAs (shRNAs) sequence against *LINC00887***

| shRNA | Sequence (5'-3') |
| --- | --- |
| Sh887#1 | TGCCTCACAATGTTTGCACTT |
| Sh887#2 | TCCCTTTGACCTGTCACTCTT |
| Sh887#3 | TTCCAAGAAGCAGCTCAGCAT |

**Table S3. List of oligonucleotides**

| Primer | Sequence (5'-3') | Research purpose |
| --- | --- | --- |
| HK1 Forward | CACATGGAGTCCGAGGTTTATG | RT-qPCR |
| HK1 Reverse | CGTGAATCCCACAGGTAACTTC | RT-qPCR |
| PFKL Forward | GCTGGGCGGCACTATCATT | RT-qPCR |
| PFKL Reverse | TCAGGTGCGAGTAGGTCCG | RT-qPCR |
| PFKM Forward | AGCTGCCTACAACCTGGTGA | RT-qPCR |
| PFKM Reverse | TCCACTCAGAACGGAAGGTGT | RT-qPCR |
| PFKP Forward | CGCCTACCTCAACGTGGTG | RT-qPCR |
| PFKP Reverse | ACCTCCAGAACGAAGGTCCTC | RT-qPCR |
| PKM1 Forward | AGCCTCAAGTCACTCCACAGAC | RT-qPCR |
| PKM1 Reverse | TGCCAGACTCCGTCAGAACTATC | RT-qPCR |
| PKM2 Forward | AGAGGCTGCCATCTACCACTTG | RT-qPCR |
| PKM2 Reverse | CAGACTTGGTGAGGACGATTATGG | RT-qPCR |
| LDHA Forward | TTGACCTACGTGGCTTGGAAG | RT-qPCR |
| LDHA Reverse | GGTAACGGAATCGGGCTGAAT | RT-qPCR |
| LDHB Forward | CCTCAGATCGTCAAGTACAGTCC | RT-qPCR |
| LDHB Reverse | ATCACGCGGTGTTTGGGTAAT | RT-qPCR |
| ALDOA Forward | CAGGGACAAATGGCGAGACTA | RT-qPCR |
| ALDOA Reverse | GGGGTGTGTTCCCCAATCTT | RT-qPCR |
| ALDOC Forward | ATGCCTCACTCGTACCCAG | RT-qPCR |
| ALDOC Reverse | TTTCCACCCCAATTTGGCTCA | RT-qPCR |
| ENO1 Forward | TGGTGTCTATCGAAGATCCCTT | RT-qPCR |
| ENO1 Reverse | CCTTGGCGATCCTCTTTGG | RT-qPCR |
| GAPDH Forward | GGAGCGAGATCCCTCCAAAAT | RT-qPCR |
| GAPDH Reverse | GGCTGTTGTCATACTTCTCATGG | RT-qPCR |
| hnRNPA1 Forward | ACATATGCCACTGTGGA GAG | RT-qPCR |
| hnRNPA1 Reverse | CTTGCTTTGACAGGGCTTTTC | RT-qPCR |
| MGC27382 Forward | AGTCCTCTCCATCTGCCCGTAG | RT-qPCR |
| MGC27382 Reverse | CGCCTGGTAGTGCCCTTCATC | RT-qPCR |
| LINC00887 Forward | CCATTCAGGAAGCTGTGGTT | RT-qPCR |
| LINC00887 Reverse | CAAACTCTGCCCAGAAGAGG | RT-qPCR |
| β-actin Forward | CTGGCCGGGACCTGACT | RT-qPCR |
| β-actin Reverse | TCCTTAATGTCACGCACGATTT | RT-qPCR |
| PKM exon8 Forward | CTGAAGGCAGTGATGTGGCC | Semi-quantitative RT-PCR |
| PKM exon11 Reverse | ACCCGGAGGTCCACGTCCTC | Semi-quantitative RT-PCR |

**Table S4. Probes used in situ hybridization (ISH) assay**

| **Digoxin-labeled probe** | | **Sequence (5'-3')** |
| --- | --- | --- |
| LINC00887-(1) | TTCTTAGGTTCCTATCTCCCTTCGACTGAGGCATCGTTTC | |
| LINC00887-(2) | CTTTGACCTGTCACTCTTTAATCCAGTGGCATTCTGATTC | |
| LINC00887-(3) | ACACTGTTAGAACTTTACTTATCCTCTTGCTTGAAGTGTG | |

**Table S5. RNA probes of RNA pull-down assays**

| **Probe** | **Sequence (5'-3')** | **Modified method** |
| --- | --- | --- |
| LNC887-WT | CUCCUUAGGGAAGCCUUCCCUACUUUCU | 5’ Biotin |
| LNC887-Mut | CUCCUUACCCAAGCCUUCCCUACUUUCU | 5’ Biotin |
| PKM-EI9-WT | AGGTAGGGCCCTAAGGGCA | 5’ Biotin |
| PKM-EI9-Mut | AGGTACCCCCCTAAGGGCA | 5’ Biotin |
